# Supplementary material for: Healthcare workers’ compliance with COVID-19 preventive measures, and associated factors, in Ethiopia: A systematic review and meta-analysis
Source: HighWire-hosted journal article supplement (doi:10.1136/bmjopen-2021-060681), 2022-08-01
Supplement: bmjopen-2021-060681supp001_data_supplement.pdf [file bmjopen-2021-060681supp001_data_supplement.pdf]

| Assessment of risk of bias of all included studies in the review |                          |                    |                                |                   |                                         |                        |                                          |                  |                      |                    |                |               |
|------------------------------------------------------------------|--------------------------|--------------------|--------------------------------|-------------------|-----------------------------------------|------------------------|------------------------------------------|------------------|----------------------|--------------------|----------------|---------------|
| S.n                                                              | Study ID/Authors         | Inclusion defined? | Subjects and setting described | Exposure measured | Objective criteria used for measurement | confounders identified | strategies used to deal with confounders | outcome measured | Statistical Analysis | Overall assessment | Final decision | quality score |
| 1                                                                | Birhanu, et al. 2021     | yes                | yes                            | yes               | yes                                     | no                     | yes                                      | yes              | yes                  | low risk of bias   | included       | 7             |
| 2                                                                | Mersha, et al. 2021      | yes                | yes                            | yes               | yes                                     | no                     | yes                                      | yes              | yes                  | low risk of bias   | included       | 7             |
| 3                                                                | Baye, et al. 2021        | no                 | yes                            | yes               | yes                                     | no                     | yes                                      | yes              | yes                  | low risk of bias   | included       | 7             |
| 4                                                                | Kassie, et al. 2020      | no                 | yes                            | yes               | yes                                     | no                     | yes                                      | yes              | yes                  | low risk of bias   | included       | 6             |
| 5                                                                | Jemal, et al. 2021       | yes                | yes                            | yes               | yes                                     | no                     | yes                                      | yes              | yes                  | low risk of bias   | included       | 6             |
| 6                                                                | Birihane, et al. 2020    | no                 | yes                            | yes               | yes                                     | no                     | no                                       | yes              | yes                  | low risk of bias   | included       | 7             |
| 7                                                                | Tadesse, et al. 2020     | yes                | yes                            | yes               | yes                                     | no                     | no                                       | yes              | yes                  | low risk of bias   | included       | 6             |
| 8                                                                | Hailu, et al. 2021       | yes                | yes                            | yes               | yes                                     | no                     | yes                                      | yes              | yes                  | low risk of bias   | included       | 7             |
| 9                                                                | Zenbaba, et al. 2021     | no                 | yes                            | yes               | yes                                     | no                     | yes                                      | yes              | yes                  | low risk of bias   | included       | 6             |
| 10                                                               | Tsegaye, et al. 2021     | no                 | yes                            | yes               | yes                                     | no                     | yes                                      | yes              | yes                  | low risk of bias   | included       | 6             |
| 11                                                               | Mindaye, et al. 2021     | no                 | yes                            | yes               | yes                                     | no                     | yes                                      | yes              | yes                  | low risk of bias   | included       | 6             |
| 12                                                               | Gebremeskal, et al. 2020 | no                 | yes                            | yes               | no                                      | no                     | yes                                      | yes              | yes                  | low risk of bias   | included       | 6             |
| 13                                                               | Bitew, et al. 2021       | no                 | yes                            | yes               | yes                                     | no                     | yes                                      | yes              | yes                  | low risk of bias   | included       | 6             |

|           |                          |         |     |     |     |    |     |     |     |                  |          |   |
|-----------|--------------------------|---------|-----|-----|-----|----|-----|-----|-----|------------------|----------|---|
| <b>14</b> | Mulu, 2020               | yes     | yes | yes | yes | no | yes | yes | yes | low risk of bias | included | 7 |
| <b>15</b> | Adola, et al. 2021       | no      | yes | yes | yes | no | yes | yes | yes | low risk of bias | included | 6 |
| <b>16</b> | Gebremedhin, et al. 2021 | no      | yes | yes | yes | no | yes | yes | yes | low risk of bias | included | 6 |
| <b>17</b> | Shibabaw, 2021           | no      | yes | yes | yes | no | yes | yes | yes | low risk of bias | included | 6 |
| <b>18</b> | Tadesse, et al. 2020     | yes     | yes | yes | yes | no | no  | yes | yes | low risk of bias | included | 7 |
| <b>19</b> | Etafa, et al. 2021       | unclear | yes | yes | yes | no | yes | yes | yes | low risk of bias | included | 6 |
| <b>20</b> | Walle, et al. 2021       | no      | yes | yes | yes | no | yes | yes | yes | low risk of bias | included | 6 |
| <b>21</b> | Tesfaye, et al. 2021     | no      | yes | no  | yes | no | yes | yes | yes | low risk of bias | included | 6 |
|           |                          |         |     |     |     |    |     |     |     |                  |          |   |

**Risk of bias assessment tool. Yes (low risk); No (high risk); Unclear(high risk)**

1. Were the criteria for inclusion in the sample clearly defined?
2. Were the study subjects and the setting described in detail?
3. Was the exposure measured in a valid and reliable way?
4. Were objective, standard criteria used for measurement of the condition?
5. Were confounding factors identified?
6. Were strategies to deal with confounding factors stated?
7. Were the outcomes measured in a valid and reliable way?
8. Was appropriate statistical analysis used?

**The overall risk of bias was then scored according to the number of high risk of bias per study: low ( $\leq 2$ ), moderate (3–4), and high ( $\geq 5$ ).**
