# Supplementary material for: Healthcare workers’ compliance with COVID-19 preventive measures, and associated factors, in Ethiopia: A systematic review and meta-analysis
Source: HighWire-hosted journal article supplement (doi:10.1136/bmjopen-2021-060681), 2022-08-01
Supplement: bmjopen-2021-060681supp004_data_supplement.pdf [file bmjopen-2021-060681supp004_data_supplement.pdf]

**Search strategy**

|   | <b>PubMed</b>                                                                                                                                                                                                                                                                                                                                                                                                                                                                                                                                      | <b>Record retrieved</b> |
|---|----------------------------------------------------------------------------------------------------------------------------------------------------------------------------------------------------------------------------------------------------------------------------------------------------------------------------------------------------------------------------------------------------------------------------------------------------------------------------------------------------------------------------------------------------|-------------------------|
| 1 | “Health Personnel”[MeSH] OR “Personnel, Health OR “Health Care Providers” OR Health Care Provider” OR “Provider, Health Care” OR “Healthcare Providers” OR “Healthcare Provider” OR “Provider, Healthcare OR “Healthcare Workers” OR “Healthcare Worker” OR “Health Care Professionals OR “Health Care Professional” OR “Professional, Health Care”                                                                                                                                                                                                | 8,304                   |
| 2 | “Professional Practice” [MeSH] OR Practice OR Professional OR Practices, Professional OR Professional Practices OR Behavior [MeSH] OR Behaviors OR “Acceptance Processes” OR “Acceptance Process” OR “Process, Acceptance” OR “Processes, Acceptance”                                                                                                                                                                                                                                                                                              | 113,015                 |
| 3 | 1 AND 2                                                                                                                                                                                                                                                                                                                                                                                                                                                                                                                                            | 5,801                   |
| 3 | Determinant OR “Epidemiologic Factors”[MeSH] OR “Epidemiologic Factor” OR “Factor, Epidemiologic” OR “Epidemiologic Determinant” OR Determinant, Epidemiologic OR Determinants, Epidemiologic OR “Epidemiologic Determinants” OR Factors, “Epidemiologic OR Predictor OR “Risk Factors” OR “Factor, Risk” OR “Risk Factor” OR “Health Correlates” OR “Correlates, Health” OR “Risk Scores” OR “Risk Score” OR “Score, Risk” OR “Risk Factor Scores” OR “Risk Factor Score OR “Score, Risk Factor” OR “Population at Risk” OR “Populations at Risk” | 14,739                  |
|   | 1 AND 2 AND 3                                                                                                                                                                                                                                                                                                                                                                                                                                                                                                                                      | 376                     |
| 4 | Prevention and control [MeSH] OR prophylaxis OR “preventive therapy” OR “prevention and control” OR “preventive measures” OR prevention OR control                                                                                                                                                                                                                                                                                                                                                                                                 | 124,697                 |
|   | #1 AND #2 AND #3 AND #4                                                                                                                                                                                                                                                                                                                                                                                                                                                                                                                            | 211                     |
| 5 | COVID-19 OR SARS-CoV-2[MeSH] OR “Coronavirus Disease 2019 Virus” OR “2019 Novel Coronavirus” OR “2019 Novel Coronaviruses” OR “Coronavirus, 2019 Novel” OR “Novel Coronavirus, 2019” OR “Wuhan Seafood Market Pneumonia Virus” OR “SARS-CoV-2 Virus” OR “SARS CoV 2 Virus” OR “SARS-CoV-2 Viruses” OR “Virus, SARS-CoV-2” OR “2019-nCoV” OR “COVID-19 Virus” OR “COVID 19 Virus” OR “COVID-19 Viruses” OR                                                                                                                                          | 51,415                  |

|   |                                                                                                                                                                                                                                                                                                                                                                                                                                                                                                                                                    |                  |
|---|----------------------------------------------------------------------------------------------------------------------------------------------------------------------------------------------------------------------------------------------------------------------------------------------------------------------------------------------------------------------------------------------------------------------------------------------------------------------------------------------------------------------------------------------------|------------------|
|   | "Virus, COVID-19" OR "Wuhan Coronavirus" OR "Coronavirus, Wuhan" OR "SARS Coronavirus 2" OR "Coronavirus 2, SARS" OR "Severe Acute Respiratory Syndrome Coronavirus 2"                                                                                                                                                                                                                                                                                                                                                                             |                  |
|   | #1 AND #2 AND #3 AND #4 AND #5                                                                                                                                                                                                                                                                                                                                                                                                                                                                                                                     | 81               |
| 6 | #1 AND #2 AND #3 AND #4 AND #5 AND English AND Ethiopia                                                                                                                                                                                                                                                                                                                                                                                                                                                                                            | 56               |
|   |                                                                                                                                                                                                                                                                                                                                                                                                                                                                                                                                                    |                  |
|   |                                                                                                                                                                                                                                                                                                                                                                                                                                                                                                                                                    |                  |
|   | Science direct(26/8/2021)                                                                                                                                                                                                                                                                                                                                                                                                                                                                                                                          | Record retrieved |
| 1 | "Health Personnel"[MeSH] OR "Personnel, Health OR "Health Care Providers" OR Health Care Provider" OR "Provider, Health Care" OR "Healthcare Providers" OR "Healthcare Provider" OR "Provider, Healthcare OR "Healthcare Workers" OR "Healthcare Worker" OR "Health Care Professionals OR "Health Care Professional" OR "Professional, Health Care"                                                                                                                                                                                                | 610              |
| 2 | "Professional Practice" [MeSH] OR Practice OR Professional OR Practices, Professional OR Professional Practices OR Behavior [MeSH] OR Behaviors OR "Acceptance Processes" OR "Acceptance Process" OR "Process, Acceptance" OR "Processes, Acceptance"                                                                                                                                                                                                                                                                                              | 530              |
| 3 | 1 AND 2                                                                                                                                                                                                                                                                                                                                                                                                                                                                                                                                            | 5,801            |
| 3 | Determinant OR "Epidemiologic Factors"[MeSH] OR "Epidemiologic Factor" OR "Factor, Epidemiologic" OR "Epidemiologic Determinant" OR Determinant, Epidemiologic OR Determinants, Epidemiologic OR "Epidemiologic Determinants" OR Factors, "Epidemiologic OR Predictor OR "Risk Factors" OR "Factor, Risk" OR "Risk Factor" OR "Health Correlates" OR "Correlates, Health" OR "Risk Scores" OR "Risk Score" OR "Score, Risk" OR "Risk Factor Scores" OR "Risk Factor Score OR "Score, Risk Factor" OR "Population at Risk" OR "Populations at Risk" | 2553             |
|   | 1 AND 2 AND 3                                                                                                                                                                                                                                                                                                                                                                                                                                                                                                                                      | 376              |
| 4 | Prevention and control [MeSH] OR prophylaxis OR "preventive therapy" OR "prevention and control" OR "preventive measures" OR prevention OR control                                                                                                                                                                                                                                                                                                                                                                                                 | 3273             |

|   |                                                                                                                                                                                                                                                                                                                                                                                                                                                                                                                                                                                  |     |
|---|----------------------------------------------------------------------------------------------------------------------------------------------------------------------------------------------------------------------------------------------------------------------------------------------------------------------------------------------------------------------------------------------------------------------------------------------------------------------------------------------------------------------------------------------------------------------------------|-----|
|   | #1 AND #2 AND #3 AND #4                                                                                                                                                                                                                                                                                                                                                                                                                                                                                                                                                          | 211 |
| 5 | COVID-19 OR SARS-CoV-2[MeSH] OR “Coronavirus Disease 2019 Virus” OR “2019 Novel Coronavirus” OR “2019 Novel Coronaviruses” OR “Coronavirus, 2019 Novel” OR “Novel Coronavirus, 2019” OR “Wuhan Seafood Market Pneumonia Virus” OR “SARS-CoV-2 Virus” OR “SARS CoV 2 Virus” OR “SARS-CoV-2 Viruses” OR “Virus, SARS-CoV-2” OR “2019-nCoV” OR “COVID-19 Virus” OR “COVID 19 Virus” OR “COVID-19 Viruses” OR “Virus, COVID-19” OR “Wuhan Coronavirus” OR “Coronavirus, Wuhan” OR “SARS Coronavirus 2” OR “Coronavirus 2, SARS” OR “Severe Acute Respiratory Syndrome Coronavirus 2” | 785 |
| 6 | #1 AND #2 AND #3 AND #4 AND #5 AND English AND Ethiopia                                                                                                                                                                                                                                                                                                                                                                                                                                                                                                                          | 45  |

|   |                                                                                                                                                                                                                                                                                                                                                                                                                                                                                                                     |                  |
|---|---------------------------------------------------------------------------------------------------------------------------------------------------------------------------------------------------------------------------------------------------------------------------------------------------------------------------------------------------------------------------------------------------------------------------------------------------------------------------------------------------------------------|------------------|
|   | Google Scholar (26/8/2021)                                                                                                                                                                                                                                                                                                                                                                                                                                                                                          | Record retrieved |
| 1 | “Health Personnel”[MeSH] OR “Personnel, Health OR “Health Care Providers” OR Health Care Provider” OR “Provider, Health Care” OR “Healthcare Providers” OR “Healthcare Provider” OR “Provider, Healthcare OR “Healthcare Workers” OR “Healthcare Worker” OR “Health Care Professionals OR “Health Care Professional” OR “Professional, Health Care”                                                                                                                                                                 | 1050             |
| 2 | “Professional Practice” [MeSH] OR Practice OR Professional OR Practices, Professional OR Professional Practices OR Behavior [MeSH] OR Behaviors OR “Acceptance Processes” OR “Acceptance Process” OR “Process, Acceptance” OR “Processes, Acceptance”                                                                                                                                                                                                                                                               | 697              |
| 3 | 1 AND 2                                                                                                                                                                                                                                                                                                                                                                                                                                                                                                             | 5,801            |
| 3 | Determinant OR “Epidemiologic Factors”[MeSH] OR “Epidemiologic Factor” OR “Factor, Epidemiologic” OR “Epidemiologic Determinant” OR Determinant, Epidemiologic OR Determinants, Epidemiologic OR “Epidemiologic Determinants” OR Factors, “Epidemiologic OR Predictor OR “Risk Factors” OR “Factor, Risk” OR “Risk Factor” OR “Health Correlates” OR “Correlates, Health” OR “Risk Scores” OR “Risk Score” OR “Score, Risk” OR “Risk Factor Scores” OR “Risk Factor Score OR “Score, Risk Factor” OR “Population at | 101000           |

|   |                                                                                                                                                                                                                                                                                                                                                                                                                                                                                                                                                                                  |       |
|---|----------------------------------------------------------------------------------------------------------------------------------------------------------------------------------------------------------------------------------------------------------------------------------------------------------------------------------------------------------------------------------------------------------------------------------------------------------------------------------------------------------------------------------------------------------------------------------|-------|
|   | Risk” OR “Populations at Risk”                                                                                                                                                                                                                                                                                                                                                                                                                                                                                                                                                   |       |
|   | 1 AND 2 AND 3                                                                                                                                                                                                                                                                                                                                                                                                                                                                                                                                                                    | 376   |
| 4 | Prevention and control [MeSH] OR prophylaxis OR “preventive therapy” OR “prevention and control” OR “preventive measures” OR prevention OR control                                                                                                                                                                                                                                                                                                                                                                                                                               | 65600 |
|   | #1 AND #2 AND #3 AND #4                                                                                                                                                                                                                                                                                                                                                                                                                                                                                                                                                          | 211   |
| 5 | COVID-19 OR SARS-CoV-2[MeSH] OR “Coronavirus Disease 2019 Virus” OR “2019 Novel Coronavirus” OR “2019 Novel Coronaviruses” OR “Coronavirus, 2019 Novel” OR “Novel Coronavirus, 2019” OR “Wuhan Seafood Market Pneumonia Virus” OR “SARS-CoV-2 Virus” OR “SARS CoV 2 Virus” OR “SARS-CoV-2 Viruses” OR “Virus, SARS-CoV-2” OR “2019-nCoV” OR “COVID-19 Virus” OR “COVID 19 Virus” OR “COVID-19 Viruses” OR “Virus, COVID-19” OR “Wuhan Coronavirus” OR “Coronavirus, Wuhan” OR “SARS Coronavirus 2” OR “Coronavirus 2, SARS” OR “Severe Acute Respiratory Syndrome Coronavirus 2” | 63600 |
| 6 | #1 AND #2 AND #3 AND #4 AND #5 AND English AND Ethiopia                                                                                                                                                                                                                                                                                                                                                                                                                                                                                                                          | 189   |

|   |                                                                                                                                                                                                                                                                                                                                                     |                  |
|---|-----------------------------------------------------------------------------------------------------------------------------------------------------------------------------------------------------------------------------------------------------------------------------------------------------------------------------------------------------|------------------|
|   | Cochrane library (27/8/2021)                                                                                                                                                                                                                                                                                                                        | Record retrieved |
| 1 | “Health Personnel”[MeSH] OR “Personnel, Health OR “Health Care Providers” OR Health Care Provider” OR “Provider, Health Care” OR “Healthcare Providers” OR “Healthcare Provider” OR “Provider, Healthcare OR “Healthcare Workers” OR “Healthcare Worker” OR “Health Care Professionals OR “Health Care Professional” OR “Professional, Health Care” | 5196             |
| 2 | “Professional Practice” [MeSH] OR Practice OR Professional OR Practices, Professional OR Professional Practices OR Behavior [MeSH] OR Behaviors OR “Acceptance Processes” OR “Acceptance Process” OR “Process, Acceptance” OR “Processes, Acceptance”                                                                                               | 15867            |
| 3 | 1 AND 2                                                                                                                                                                                                                                                                                                                                             | 5,801            |
| 3 | Determinant OR “Epidemiologic Factors”[MeSH] OR “Epidemiologic Factor”                                                                                                                                                                                                                                                                              | 23126            |

|   |                                                                                                                                                                                                                                                                                                                                                                                                                                                                                                                                                                                  |       |
|---|----------------------------------------------------------------------------------------------------------------------------------------------------------------------------------------------------------------------------------------------------------------------------------------------------------------------------------------------------------------------------------------------------------------------------------------------------------------------------------------------------------------------------------------------------------------------------------|-------|
|   | OR “Factor, Epidemiologic” OR “Epidemiologic Determinant” OR Determinant, Epidemiologic OR Determinants, Epidemiologic OR “Epidemiologic Determinants” OR Factors, “Epidemiologic OR Predictor OR “Risk Factors” OR “Factor, Risk” OR “Risk Factor” OR “Health Correlates” OR “Correlates, Health” OR “Risk Scores” OR “Risk Score” OR “Score, Risk” OR “Risk Factor Scores” OR “Risk Factor Score OR “Score, Risk Factor” OR “Population at Risk” OR “Populations at Risk”                                                                                                      |       |
|   | 1 AND 2 AND 3                                                                                                                                                                                                                                                                                                                                                                                                                                                                                                                                                                    | 376   |
| 4 | Prevention and control [MeSH] OR prophylaxis OR “preventive therapy” OR “prevention and control” OR “preventive measures” OR prevention OR control                                                                                                                                                                                                                                                                                                                                                                                                                               | 18022 |
|   | #1 AND #2 AND #3 AND #4                                                                                                                                                                                                                                                                                                                                                                                                                                                                                                                                                          | 211   |
| 5 | COVID-19 OR SARS-CoV-2[MeSH] OR “Coronavirus Disease 2019 Virus” OR “2019 Novel Coronavirus” OR “2019 Novel Coronaviruses” OR “Coronavirus, 2019 Novel” OR “Novel Coronavirus, 2019” OR “Wuhan Seafood Market Pneumonia Virus” OR “SARS-CoV-2 Virus” OR “SARS CoV 2 Virus” OR “SARS-CoV-2 Viruses” OR “Virus, SARS-CoV-2” OR “2019-nCoV” OR “COVID-19 Virus” OR “COVID 19 Virus” OR “COVID-19 Viruses” OR “Virus, COVID-19” OR “Wuhan Coronavirus” OR “Coronavirus, Wuhan” OR “SARS Coronavirus 2” OR “Coronavirus 2, SARS” OR “Severe Acute Respiratory Syndrome Coronavirus 2” | 6610  |
| 6 | #1 AND #2 AND #3 AND #4 AND #5 AND English AND Ethiopia                                                                                                                                                                                                                                                                                                                                                                                                                                                                                                                          | 233   |
|   | #1 AND #2 AND #3 AND #4 AND #5 AND English AND Ethiopia                                                                                                                                                                                                                                                                                                                                                                                                                                                                                                                          | 77    |
